# Supplementary material for: Aromatic tripodal receptors for (C60-Ih)[5,6]fullerene
Source: Royal Society of Chemistry journal article supplement (doi:10.1039/b910921h), 2009-01-01
Supplement: b910921h.pdf [file b910921h.pdf]

### Supporting Information

#### Aromatic Tripodal Receptor for (C<sub>60</sub>-I<sub>h</sub>)[5,6]Fullerene

G. M. Dell'Anna, R. Annunziata, M. Benaglia, G. Celentano, F. Cozzi,\* O. Francesconi, and S. Roelens\*

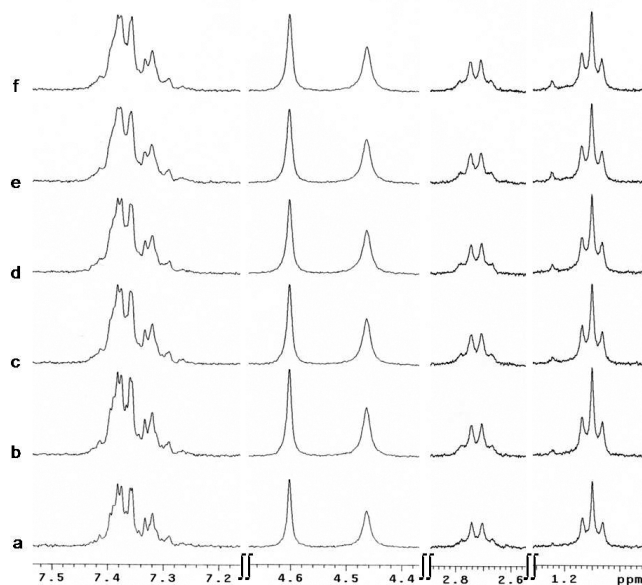

**Figure S1.** <sup>1</sup>H-NMR spectra (200 MHz, Cl<sub>2</sub>CDCl<sub>2</sub>) of: (a) **3H** 1.92 mM; (b-f) portion-wise addition of increasing amounts of fullerene up to 5.5 mM (saturated solution).

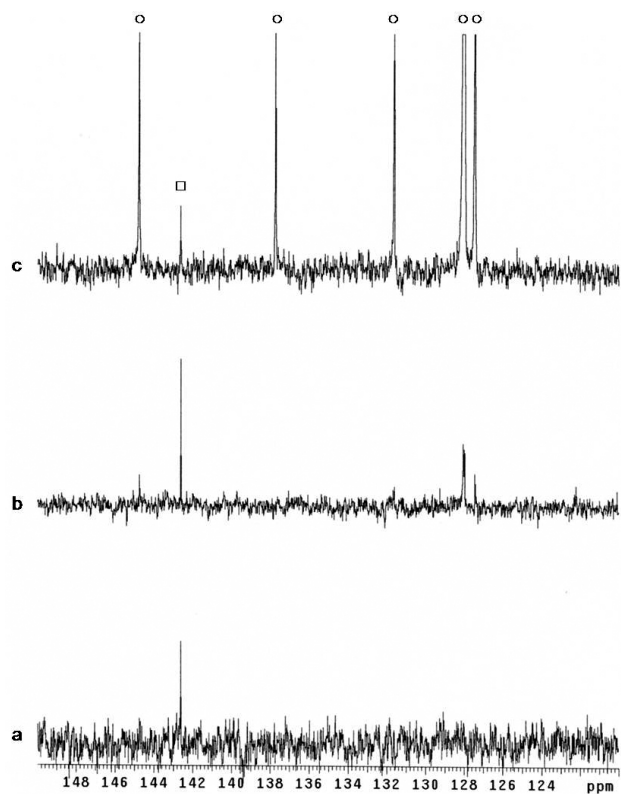

**Figure S2.**  $^{13}\text{C}$ -NMR spectra (50 MHz,  $\text{Cl}_2\text{CDCDCl}_2$ ) of: (a) fullerene 5.5 mM. **3H**, 0.475 mM; (b) fullerene 5.5 mM. **3H**, 1.92 mM; (c) fullerene 5.5 mM. **3H**, 85 mM. (  $\circ$  ) Fullerene; (  $\square$  ) **3H**.

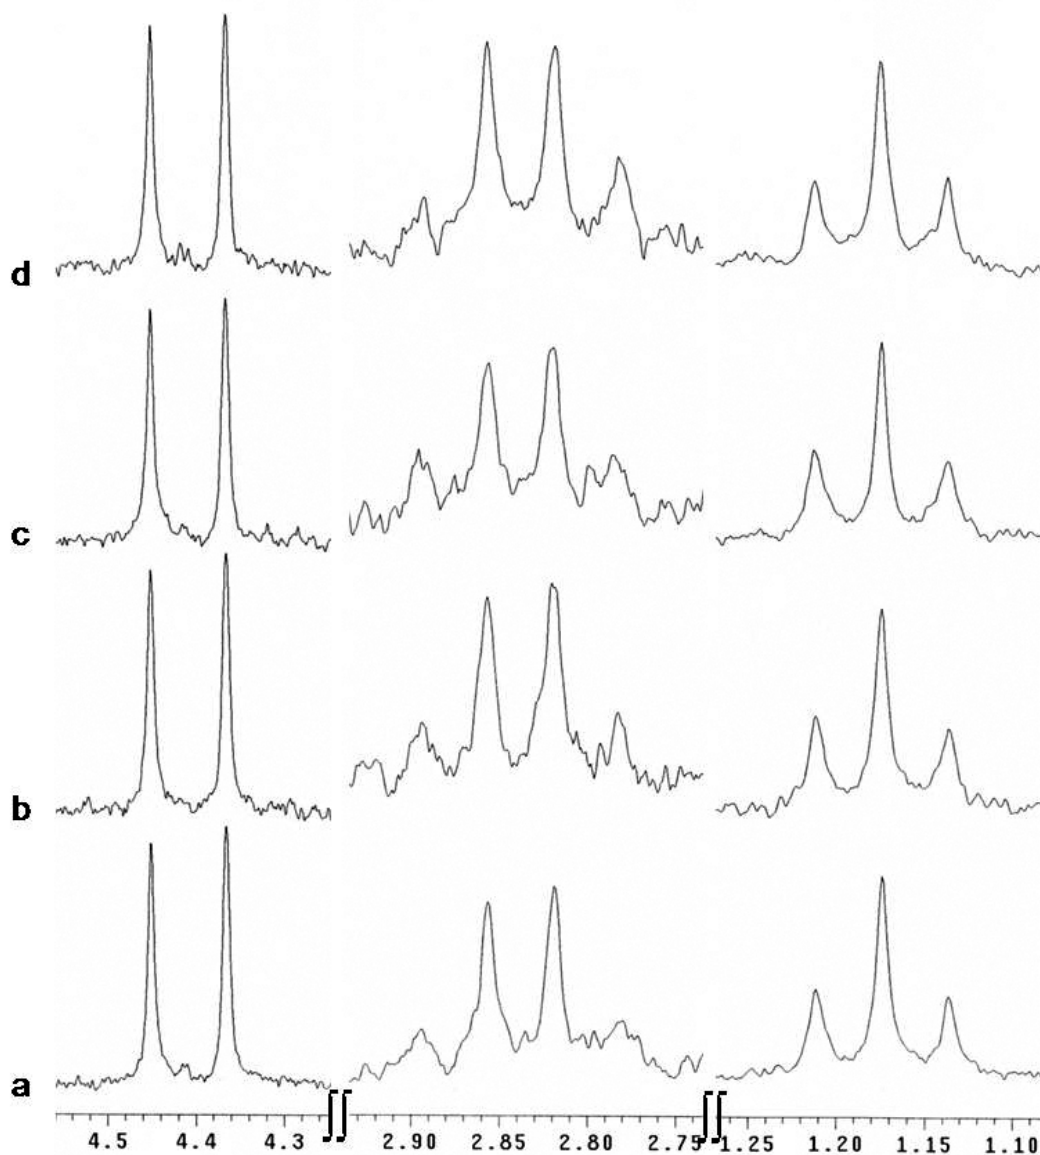

**Figure S3.**  $^1\text{H}$ -NMR spectra (200 MHz, toluene- $d_8$ ) of: (a) **3H** 0.31 mM; (b-d) portionwise addition of increasing amounts of fullerene up to 4.0 mM (saturated solution).

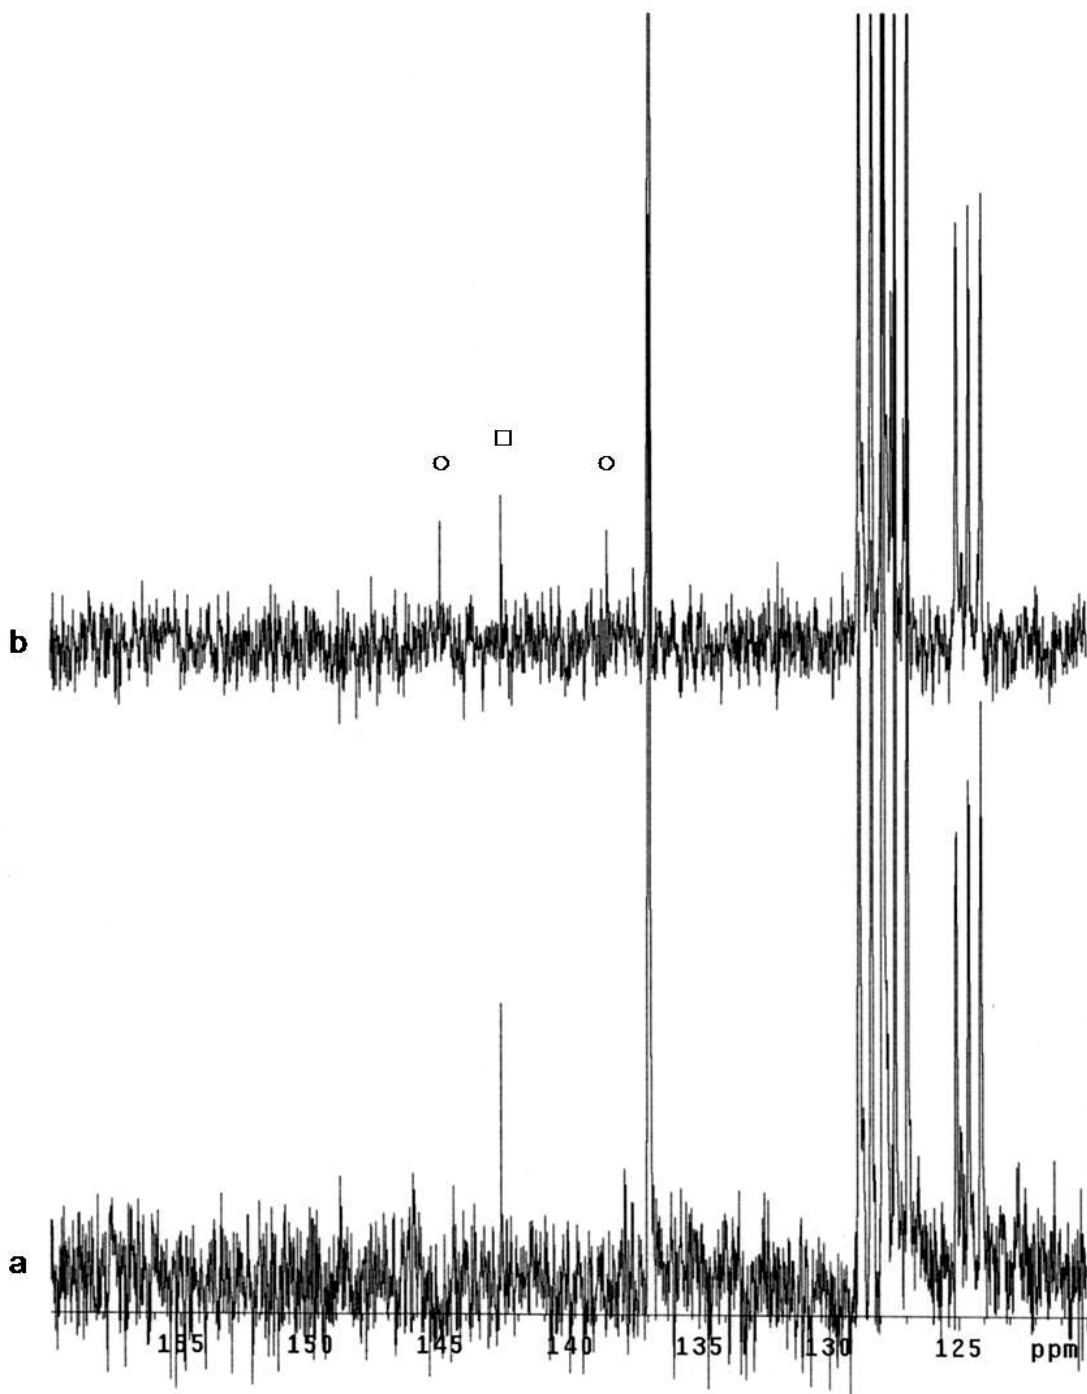

**Figure S4.**  $^{13}\text{C}$ -NMR spectra (50 MHz, toluene- $d_8$ ) of: (a) fullerene (4.0 mM) and **3H** (4.0 mM); (b) fullerene (4.0 mM) and **3H** (30.0 mM). ( $\square$ ) Fullerene; ( $\circ$ ) **3H**.

AEI+nano #1 RT: 0.00 AV: 1 NL: 2.61E5  
T: ITMS + p NSI Full ms [150.00-2000.00]

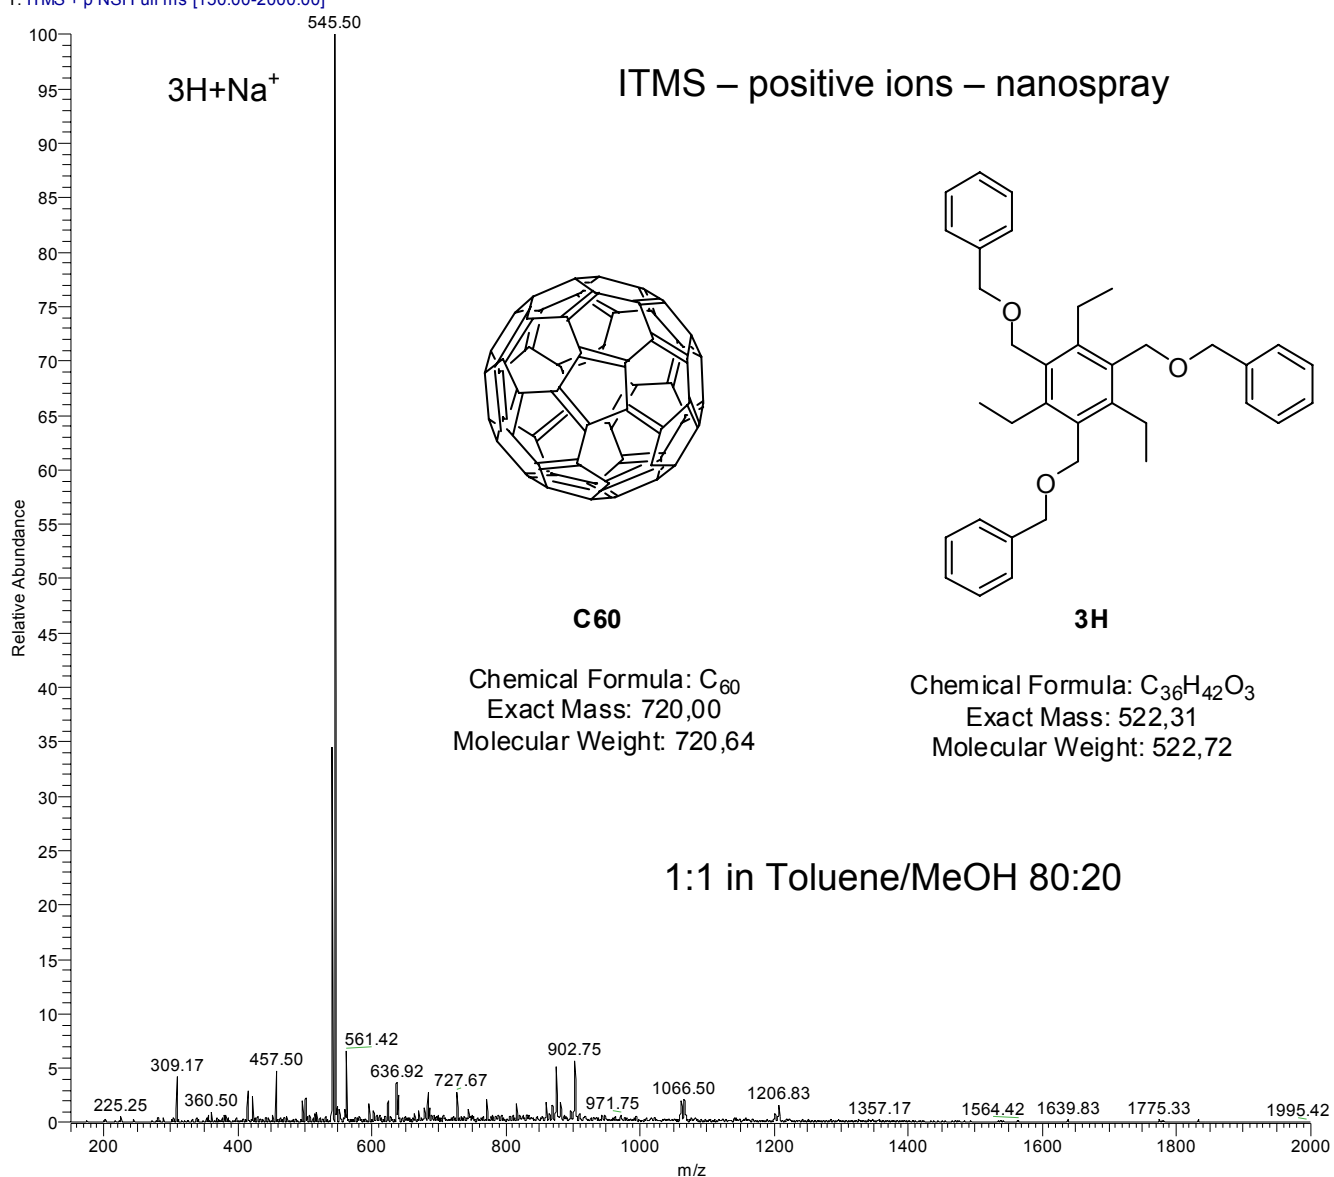

**Figure S5.** ESI-MS-ion-trap (positive mode). Nano injection of equimolar solution (0.222 mM) of C<sub>60</sub> and 3H in toluene/methanol 80:20.

C ESI-nano #1 RT: 0.00 AV: 1 NL: 1.57E5  
T: ITMS - p NSI Full ms [150.00-2000.00]

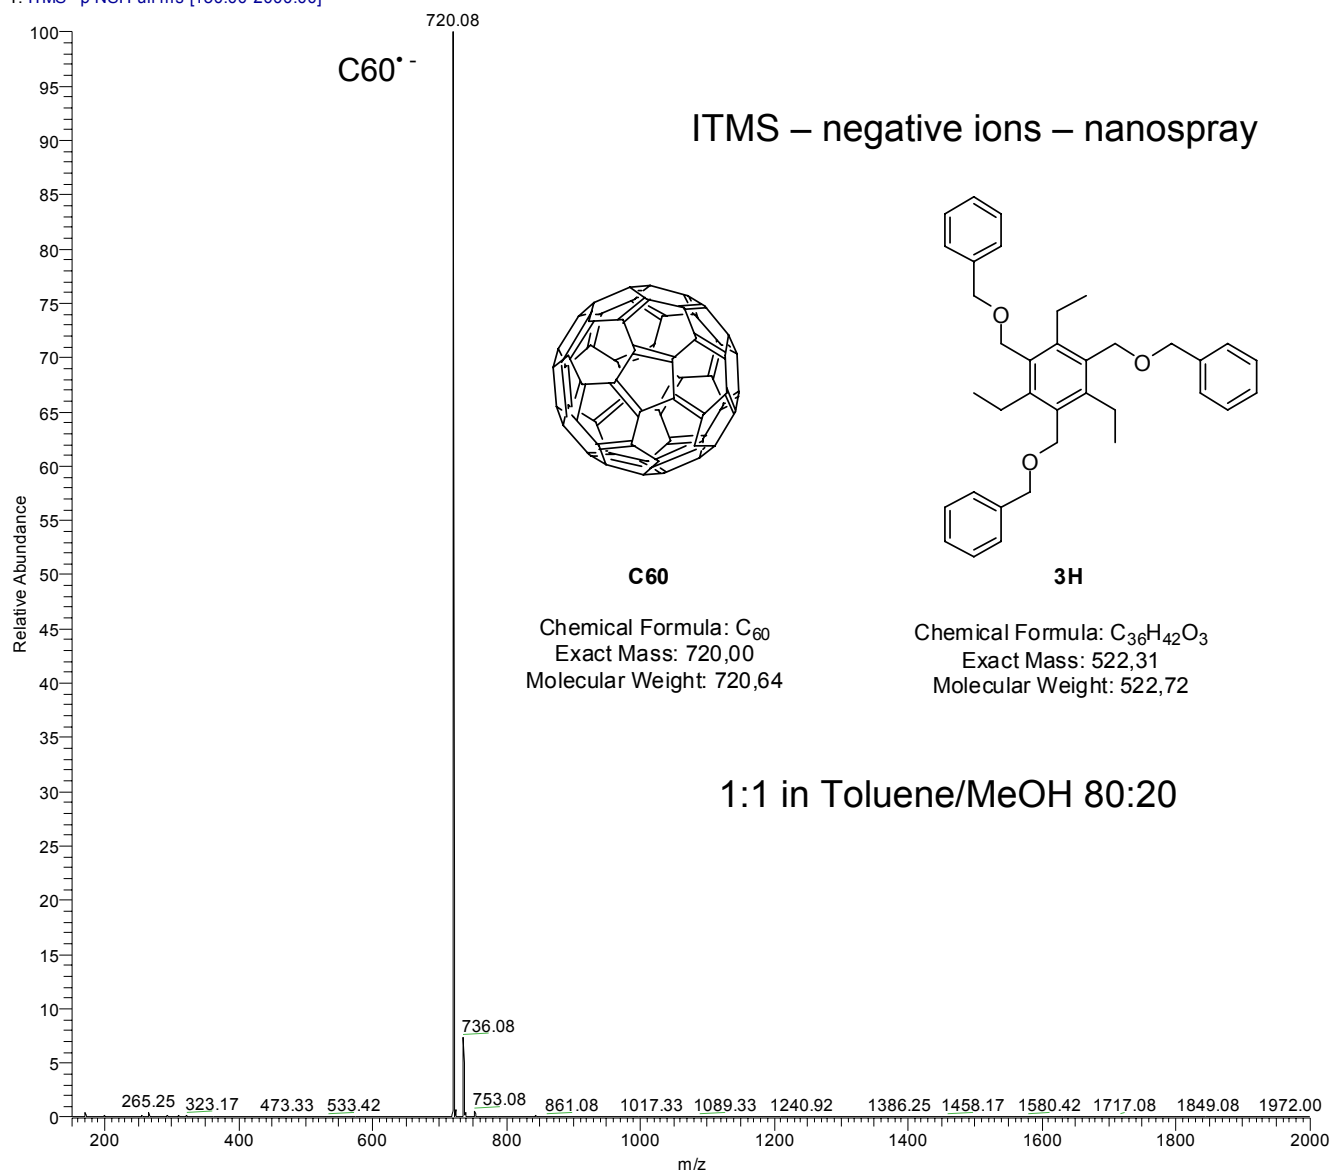

**Figure S6.** ESI-MS-ion-trap (negative mode). Nano injection of equimolar solution (0.222 mM) of C<sub>60</sub> and 3H in toluene/methanol 80:20.
